# Supplementary material for: Trends in Self-Reported Migraine or Frequent Headache in Spain between 2006 and 2023: The Role of Sociodemographic Factors
Source: Research Square preprint supplement (doi:10.21203/rs.3.rs-8508233/v1), 2026-01-23
Supplement: Supplementary file 1 [file 330dfc8a17ca46357b23001e.docx]

**Table 1.** Tendency and predicted values for the prevalence of self-reported migraine or frequent headache.

| Variable | M-K τ* | M-K p* | Forecasted values | | |
| --- | --- | --- | --- | --- | --- |
| Year | Prevalence (%) | 95% CI |
| Total SR-M/FH  (S-curve model) | -0.62 | 0.07 | 2026  2029  2032 | 9.57  9.55  9.53 | 6.67-13.73  6.65-13.70  6.63-13.68 |
| Physician-diagnosed SR-M/FH  (S-curve model) | -0.33 | 0.381 | 2026  2029  2032 | 7.97  7.95  7.94 | 6.10-10.42  6.10-10.40  6.07-10.38 |

*Kendall’s tau and p-value associated with the Mann-Kendall test for the significance of the trend over time.

Abbreviations: Self-reported migraine or frequent headache (SR-M/FH); confidence interval (CI).
