# Supplementary material for: Trends in Self-Reported Migraine or Frequent Headache in Spain between 2006 and 2023: The Role of Sociodemographic Factors
Source: Research Square preprint supplement (doi:10.21203/rs.3.rs-8508233/v1), 2026-01-23
Supplement: Supplementary file 2 [file 3ce0e2ccc858a35920d6618b.docx]

**Trends in Self-Reported Migraine or Frequent Headache in Spain between 2006 and 2023: The Role of Sociodemographic Factors**

**Supplementary Information**

Miguel Á. Huertaa,b MSc, Jose A. Moral-Munozc,d,e* PhD, Masahito Katsukif,g MD PhD,

Yasuhiko Matsumorih MD PhD, Alejandro Salazard,e,i PhD

a Department of Pharmacology and Neurosciences Institute (Biomedical Research Center), University of Granada.

b Biosanitary Research Institute ibs.GRANADA, Granada, Spain.

c Department of Nursing and Physiotherapy, University of Cadiz, Cadiz, Spain.

d Biomedical Research and Innovation Institute of Cadiz (INiBICA), Cadiz, Spain.

e Observatory of Pain, Grünenthal Foundation-University of Cadiz, Cadiz, Spain.

f Insight Science Foundation Ireland Research Centre for Data Analytics, School of Human and Health Performance, Dublin City University, Dublin, Ireland.

g Physical Education and Health Center, Nagaoka University of Technology, Niigata, Japan.

h Sendai Neurology and Headache Clinic, Sendai, Miyagi, Japan.

i Department of Statistics and Operational Research, University of Cadiz, Cadiz, Spain.

***Corresponding author:** Jose A. Moral-Munoz. Address: Av. Ana de Viya, 52, 11009 Cádiz, Cádiz (Spain). Email: [joseantonio.moral@uca.es](mailto:joseantonio.moral@uca.es)

**
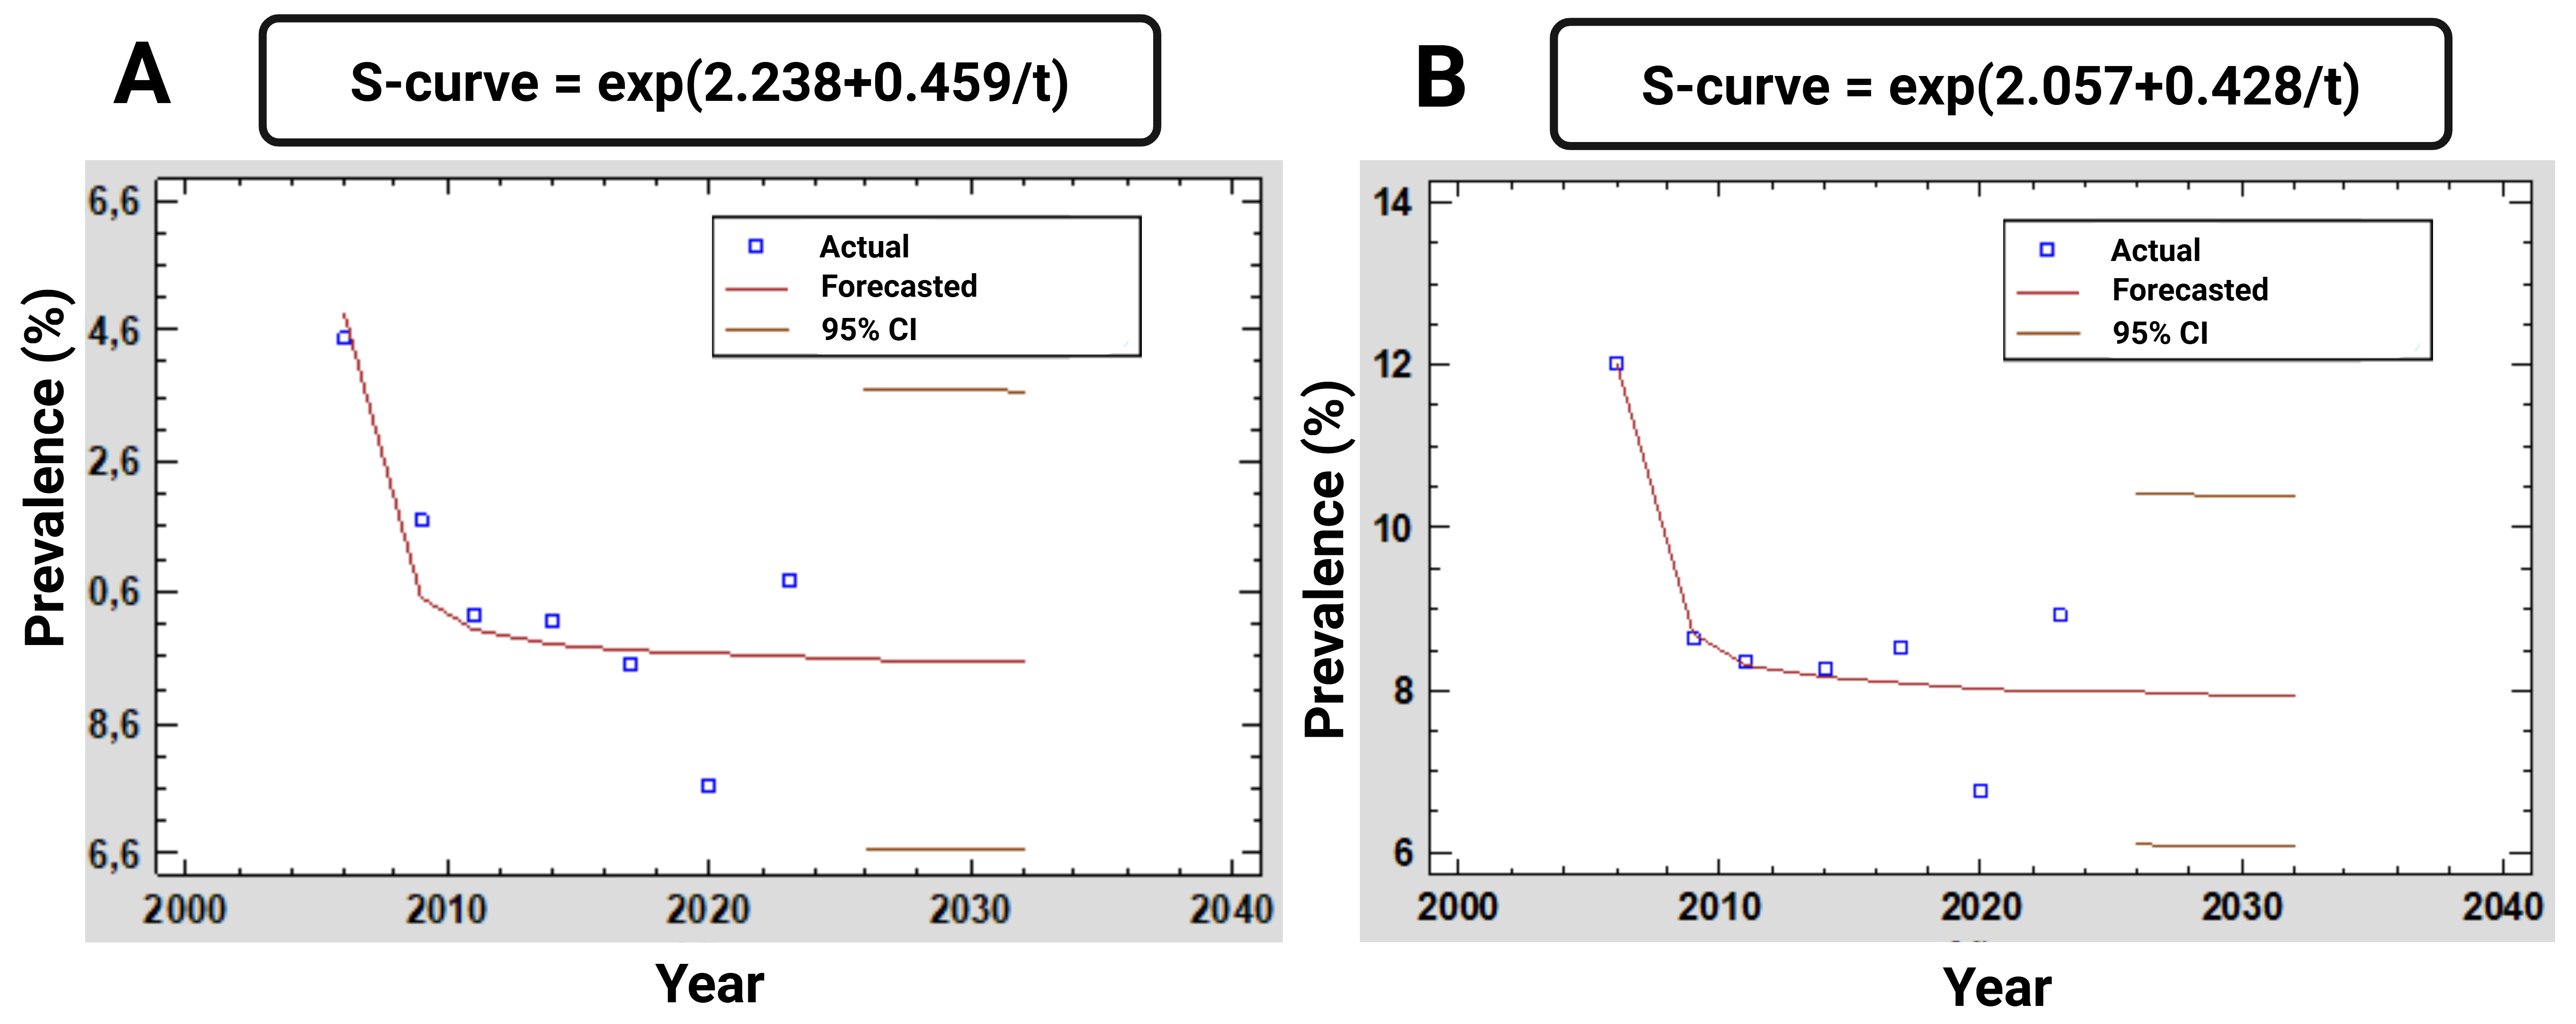
**

**Figure S1. Run chart and time-series plot showing the evolution of the prevalence of self-reported migraine or frequent headache in the general Spanish population.** Observed data points are plotted alongside an exponential trend line with 95% confidence intervals for forecasted estimates of total (A) and diagnosed (B) self-reported migraine or frequent headache
